# Supplementary material for: Functional microporous polyimides based on sulfonated binaphthalene dianhydride for uptake and separation of carbon dioxide and vapors
Source: Royal Society of Chemistry journal article supplement (doi:10.1039/c3ta11621b), 2013-01-01
Supplement: c3ta11621b.pdf [file c3ta11621b.pdf]

## Electronic Supplementary Information

### Functional Microporous Polyimides Based on Sulfonated Binaphthalene Dianhydride for Carbon Dioxide and Vapor Uptake

Yanqin Yang,<sup>a,b</sup> Qiang Zhang,<sup>a,b</sup> Zhiguang Zhang<sup>a</sup> and Suobo Zhang<sup>a\*</sup>

<sup>a</sup> Key Laboratory of Polymer Ecomaterials, Changchun Institute of Applied Chemistry, Chinese Academy of Sciences, Changchun 130022, China.

<sup>b</sup> University of Chinese Academy of Sciences, Beijing 100049, China.

\* Corresponding author. Fax: +86 431 85262117; Tel: +86 431 85262118; E-mail: sbzhang@ciac.jl.cn

#### Contents

**Fig. S1** PXRD-pattern for the SMPIs.

**Fig. S2** FT-IR spectra of the SMPIs-0 and SMPIs-100 before and after boiled in water 100 for 48h.

**Fig. S3** Isothermic heats of sorption for CO<sub>2</sub> on the SMPs.

**Table S1** The amount of chemicals used for synthesis of SMPIs.

**Table S2** Elemental analysis of SMPIs.

**Table S3** Initial slopes of CO<sub>2</sub> and N<sub>2</sub> isotherms at 273 K.

**Table S4** Initial slopes of vapor isotherms at 298 K.

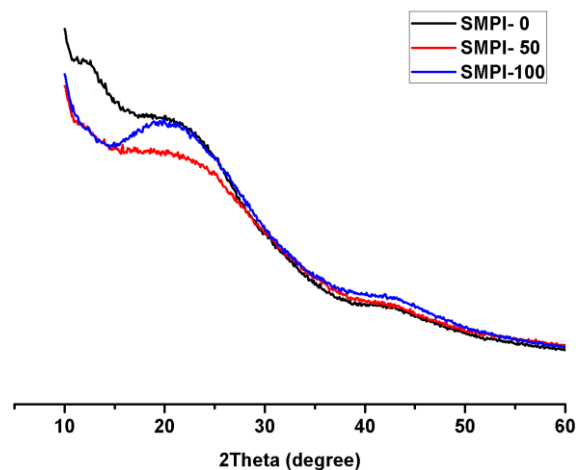

Fig. S1 PXR D-pattern for the SMPI-x.

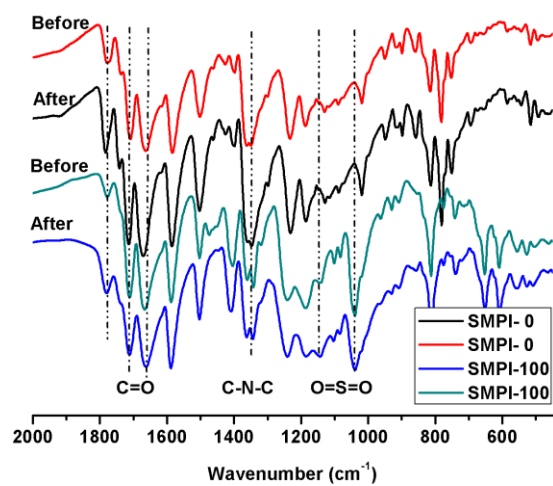

Fig. S2 FT-IR spectra of the SMPIs-0 and SMPIs-100 before and after boiled in water 100 for 48 h.

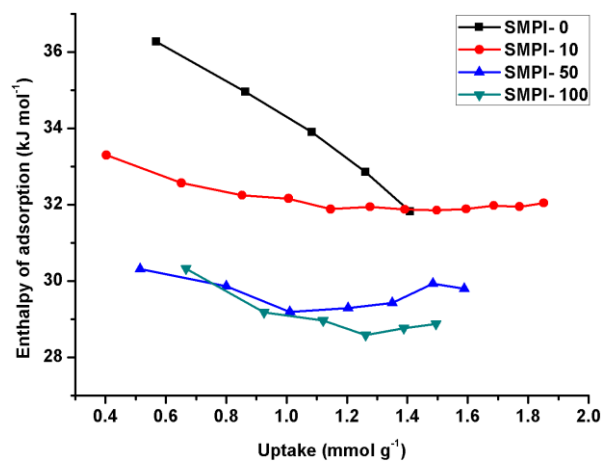

Fig. S3 Isosteric heats of sorption for CO<sub>2</sub> on the SMPIs.

**Table S1** The amount of chemicals used for synthesis of SMPIs.

| Sample   | TAPM         | BTDA          | SBTDA         | Benzoic acid | Triethyamine | m-cresol |
|----------|--------------|---------------|---------------|--------------|--------------|----------|
|          | g (mmol)     | g (mmol)      | g (mmol)      | g (mmol)     | mL           | mL       |
| SMPI-0   | 0.4566 (1.2) | 0.9464 (2.4)  | --            | 1.1724 (9.6) | --           | 30       |
| SMPI-10  | 0.4566 (1.2) | 0.8518 (2.16) | 0.1331 (0.24) | 1.1724 (9.6) | 0.12         | 40       |
| SMPI-50  | 0.4566 (1.2) | 0.4732 (1.2)  | 0.6654 (1.2)  | 1.1724 (9.6) | 0.6          | 55       |
| SMPI-100 | 0.4566 (1.2) | --            | 1.3307 (2.4)  | 1.1724 (9.6) | 1.4          | 70       |

**Table S2** Elemental analysis of SMPIs.

| Sample   | Observed Values |       |       | Theoretical Values |       |       |
|----------|-----------------|-------|-------|--------------------|-------|-------|
|          | C [%]           | N [%] | S [%] | C [%]              | N [%] | S [%] |
| SMPI-0   | 73.3            | 4.57  | 0.123 | 79.9               | 5.10  | 0     |
| SMPI-10  | 71.3            | 4.66  | 0.91  | 77.6               | 4.96  | 1.14  |
| SMPI-50  | 63.9            | 5.57  | 4.70  | 69.7               | 4.46  | 5.09  |
| SMPI-100 | 58.3            | 3.92  | 8.51  | 62.9               | 3.95  | 9.05  |

**Table S3** Initial slopes of CO<sub>2</sub> and N<sub>2</sub> isotherms at 273 K.

| Sample   | Initial slopes of isotherms at 273 K |                                    |
|----------|--------------------------------------|------------------------------------|
|          | CO <sub>2</sub> adsorption isotherm  | N <sub>2</sub> adsorption isotherm |
| SMPI-0   | $y = 85.63x + 9.4729$                | $y = 2.9113x + 0.004$              |
| SMPI-10  | $y = 105.36x + 11.292$               | $y = 3.2799x + 0.049$              |
| SMPI-50  | $y = 99.711x + 10.041$               | $y = 2.0754x - 0.0873$             |
| SMPI-100 | $y = 90.098x + 11.634$               | $y = 1.5641x + 0.0597$             |

**Table S4** Initial slopes of vapor isotherms at 298 K.

| Sample   | Initial slopes of isotherms at 298 K  |                                                      |                                                   |
|----------|---------------------------------------|------------------------------------------------------|---------------------------------------------------|
|          | CH <sub>4</sub> O adsorption isotherm | c-C <sub>6</sub> H <sub>12</sub> adsorption isotherm | C <sub>6</sub> H <sub>6</sub> adsorption isotherm |
| SMPI-0   | $y = 314.53x + 22.296$                | $y = 67.687x + 5.8149$                               | $y = 381.63x + 22.111$                            |
| SMPI-10  | $y = 550.33x + 33.080$                | $y = 101.12x + 20.057$                               | $y = 314.51x + 36.751$                            |
| SMPI-50  | $y = 507.21x + 39.496$                | $y = 5.4351x - 0.1354$                               | $y = 9.1065x + 0.0314$                            |
| SMPI-100 | $y = 534.13x + 49.516$                | $y = 4.0654x - 0.0422$                               | $y = 2.8089x - 0.1806$                            |
